# Supplementary material for: Morbid liver manifestations are intrinsically bound to metabolic syndrome and nutrient intake based on a machine-learning cluster analysis
Source: Frontiers journal article supplement (doi:10.3389/fendo.2022.936956), 2022-09-06
Supplement: Data_Sheet_1.PDF [file Data_Sheet_1.PDF]

**Supplementary Table 1:** Criteria for the categorization of the variables used in the analysis.

| Variable                 | Categorization                                                    | Source |
|--------------------------|-------------------------------------------------------------------|--------|
| <b>Waist-Hip Ratio</b>   | < 0.85 (women) < 0.90 (men)                                       | (55)   |
|                          | ≥ 0.85 (women) ≥ 0.90 (men)                                       |        |
| <b>Hypertension</b>      | Diastolic Pressure < 85 mm Hg - No medicated                      | (5)    |
|                          | Diastolic Pressure ≥ 85 mm Hg < 90 mm Hg- No medicated            |        |
|                          | Diastolic Pressure ≥ 90 mm Hg - No medicated                      |        |
|                          | Diastolic Pressure < 85 mm Hg - Medicated                         |        |
|                          | Diastolic Pressure ≥ 85 mm Hg < 90 mm Hg- Medicated               |        |
|                          | Diastolic Pressure ≥ 90 mm Hg - Medicated                         |        |
| <b>Glucose</b>           | Fasting blood glucose levels < 126 mg/dl - No medicated           | (5)    |
|                          | Fasting blood glucose levels ≥ 126 mg/dl - No medicated           |        |
|                          | Fasting blood glucose levels < 126 mg/dl - Medicated              |        |
|                          | Fasting blood glucose levels ≥ 126 mg/dl - Medicated              |        |
| <b>HDL</b>               | Fasting blood HDL levels < 50 mg/dl (women) < 40 mg/dl (men)      | (5)    |
|                          | Fasting blood HDL levels ≥ 50 mg/dl (women) ≥ 40 mg/dl (men)      |        |
| <b>LDL</b>               | Fasting blood LDL levels < 100 mg/dl - No medicated               | (5)    |
|                          | Fasting blood LDL levels ≥ 100 mg/dl - No medicated               |        |
|                          | Fasting blood LDL levels < 100 mg/dl - Medicated                  |        |
|                          | Fasting blood LDL levels ≥ 100 mg/dl - Medicated                  |        |
| <b>Cholesterol</b>       | Fasting blood cholesterol levels < 200 mg/dl - No medicated       | (5)    |
|                          | Fasting blood cholesterol levels < 200 mg/dl - Medicated          |        |
|                          | Fasting blood cholesterol levels ≥ 200 mg/dl - No medicated       |        |
|                          | Fasting blood cholesterol levels ≥ 200 mg/dl - Medicated          |        |
| <b>NLI</b>               | Neutrophils-Lymphocytes Index < 1.35                              | (56)   |
|                          | Neutrophils-Lymphocytes Index ≥ 1.35 < 2.25                       |        |
|                          | Neutrophils-Lymphocytes Index ≥ 2.25                              |        |
| <b>Platelets</b>         | Platelets < 150 (10 <sup>3</sup> /μL)                             | (57)   |
|                          | Platelets ≥ 150 (10 <sup>3</sup> /μL) < 400 (10 <sup>3</sup> /μL) |        |
|                          | Platelets ≥ 400 (10 <sup>3</sup> /μL)                             |        |
| <b>AST</b>               | AST < 8 (UI)                                                      | (58)   |
|                          | AST ≥ 8 (UI) < 33 (UI)                                            |        |
|                          | AST ≥ 33 (UI)                                                     |        |
| <b>ALT</b>               | ALT < 4 (UI)                                                      | (58)   |
|                          | ALT ≥ 4 (UI) < 36 (UI)                                            |        |
|                          | ALT ≥ 36 (UI)                                                     |        |
| <b>GGT</b>               | GGT < 5 (UI)                                                      | (58)   |
|                          | GGT ≥ 5 (UI) < 40 (UI)                                            |        |
|                          | GGT ≥ 40 (UI)                                                     |        |
| <b>Pain treatment</b>    | Presence                                                          | -      |
|                          | Absence                                                           |        |
| <b>Tranquilizers use</b> | Presence                                                          | -      |
|                          | Absence                                                           |        |
| <b>Insulin use</b>       | Presence                                                          | -      |
|                          | Absence                                                           |        |

|                                            |          |   |
|--------------------------------------------|----------|---|
| <b>No metformin<br/>diabetes treatment</b> | Presence | - |
|                                            | Absence  |   |
| <b>CVD medication</b>                      | Presence | - |
|                                            | Absence  |   |
| <b>Aspirin use</b>                         | Presence | - |
|                                            | Absence  |   |

**Supplementary Figure 1:** Selection of the number of clusters.

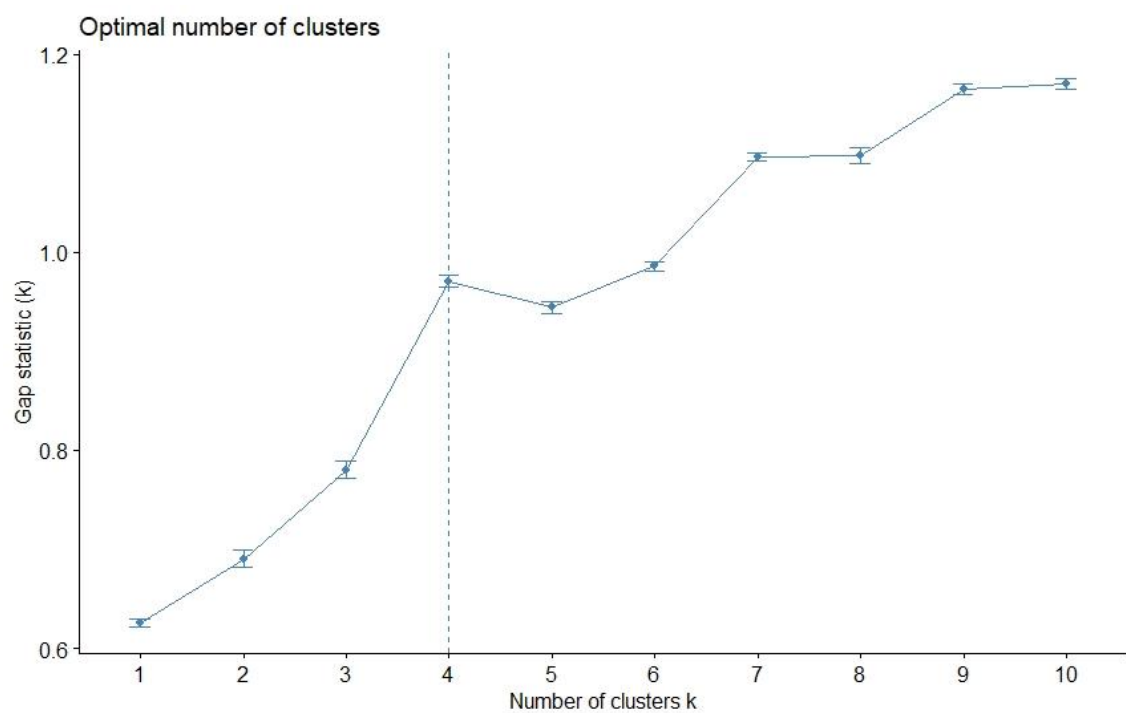

**Supplementary table 2.** Differences between clusters in pharmacological treatments adjusted by sex, age and recruitment center. between clusters.

|                                        | <b>Cluster 1</b><br><b>(N=616)</b> | <b>Cluster 2</b><br><b>(N=1612)</b> | <b>Cluster 3</b><br><b>(N=575)</b> | <b>Cluster 4</b><br><b>(N=1360)</b> | <b><i>p</i>-value</b> |
|----------------------------------------|------------------------------------|-------------------------------------|------------------------------------|-------------------------------------|-----------------------|
| <b>Hypertension treatment</b>          | 521 (84.6%)                        | 1303 (80.8%)                        | 467 (81.2%)                        | 1057 (77.7%)                        | <0.001                |
| NA                                     | 0 (0%)                             | 0 (0%)                              | 0 (0%)                             | 0 (0%)                              |                       |
| <b>Cholesterol treatment</b>           | 444 (72.1%)                        | 1001 (62.1%)                        | 298 (51.8%)                        | 489 (36.0%)                         | <0.001                |
| NA                                     | 0 (0%)                             | 0 (0%)                              | 0 (0%)                             | 0 (0%)                              |                       |
| <b>Metformin treatmen</b>              | 560 (90.9%)                        | 160 (9.9%)                          | 167 (29.0%)                        | 59 (4.3%)                           | <0.001                |
| <b>Estatins treatment</b>              | 423 (68.7%)                        | 956 (59.3%)                         | 261 (45.4%)                        | 430 (31.6%)                         | <0.001                |
| <b>Aspirin treatment</b>               | 188 (30.5%)                        | 230 (14.3%)                         | 88 (15.3%)                         | 121 (8.9%)                          | <0.001                |
| NA                                     | 0 (0%)                             | 0 (0%)                              | 0 (0%)                             | 1 (0.1%)                            |                       |
| <b>Pain treatment</b>                  | 163 (26.5%)                        | 443 (27.5%)                         | 152 (26.4%)                        | 413 (30.4%)                         | <0.001                |
| <b>CVD treatment</b>                   | 62 (10.1%)                         | 156 (9.7%)                          | 38 (6.6%)                          | 73 (5.4%)                           | <0.001                |
| NA                                     | 0 (0%)                             | 1 (0.1%)                            | 1 (0.2%)                           | 1 (0.1%)                            |                       |
| <b>No metformin diabetes treatment</b> | 611 (99.2%)                        | 17 (1.1%)                           | 133 (23.1%)                        | 21 (1.5%)                           | <0.001                |
| <b>Tranquilizers treatment</b>         | 137 (22.2%)                        | 414 (25.7%)                         | 125 (21.7%)                        | 369 (27.1%)                         | <0.001                |
| NA                                     | 0 (0%)                             | 1 (0.1%)                            | 0 (0%)                             | 1 (0.1%)                            |                       |
| <b>Insulin</b>                         | 105 (17.0%)                        | 18 (1.1%)                           | 16 (2.8%)                          | 5 (0.4%)                            | <0.001                |

p-value refers to ANOVA test comparisons
